# Supplementary material for: Low-cost conversion of Mo industrial waste powder into MoO 3 nanobelts catalysts for Oxygen Evolution Reaction
Source: Research Square preprint supplement (doi:10.21203/rs.3.rs-3873315/v1), 2024-02-15
Supplement: Supplementary file 1 [file 3868b2a727d7f45ce4bcb692.docx]

**Supporting Information**

**Low-cost conversion of Mo industrial waste powder into MoO3 nanobelts catalysts for Oxygen Evolution Reaction**

F. Ursino1,2, G. Mineo1, A. Scandurra1,2, Angelo Forestan3, Catya Alba3, R. Reitano1, A. Terrasi1,2 and S. Mirabella1,2*

1 Dipartimento di Fisica e Astronomia “Ettore Majorana”, Università degli Studi di Catania, via S. Sofia 64, 95123 Catania, Italy.

2 CNR-IMM, Università di Catania, via S. Sofia 64, 95123 Catania, Italy.

3R&D Spirit Srl-Soc. Unipersonale, Via dei Laghi 67, 36072 Vicenza, Italy.

*E-mail corresponding: [salvo.mirabella@dfa.unict.it](mailto:salvo.mirabella@dfa.unict.it)

## RBS analysis

The Mo and O atomic doses were estimated thanks to Rutherford Backscattering Spectrometry (RBS). For stoichiometric MoO3 the expected O/Mo atomic dose ratio is equal to 3. The doses were calculated for the signal starting at 0.7 and 2.1 MeV (**Figure S 1a-b)**, which stand, respectively, for He+ backscattered by oxygen (O) and by molybdenum (Mo). The area under the peak is proportional to the atomic dose multiplied by the back-scatering atomic cross section. The O/Mo ratio for Mo-based powder is equal to 2.0, while for pH 1.26 sample the ratio is close to 3.4. From these results we assign pH 1.26 sample to MoO3, while the Mo-based starting powder are substoichimetric molybdenum oxide.


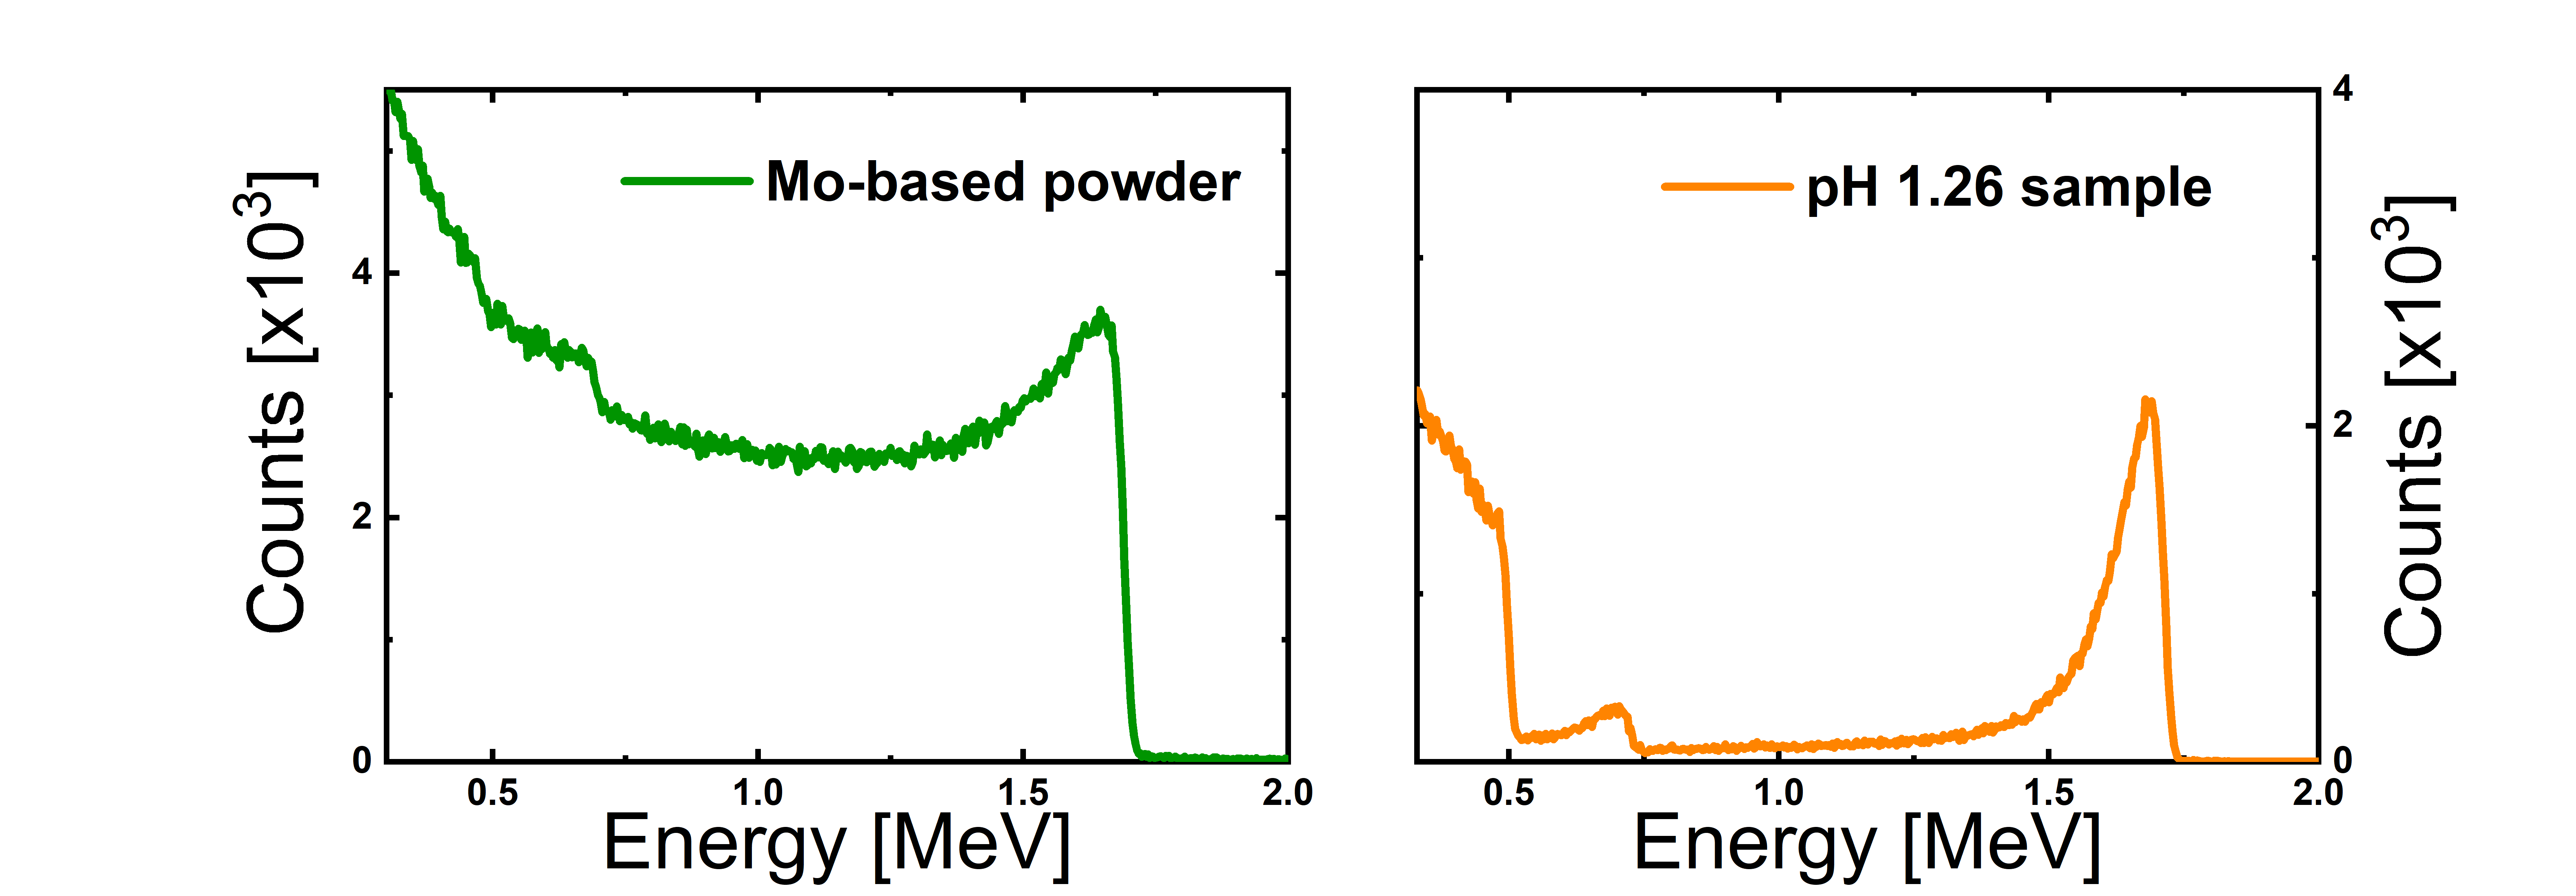


**Figure S 1 RBS analysis of: a) Mo-based powder with a Mo/O ratio of about 11 b) pH 1.26 synthesis with a Mo/O ratio equal to 6.**

## SEM images


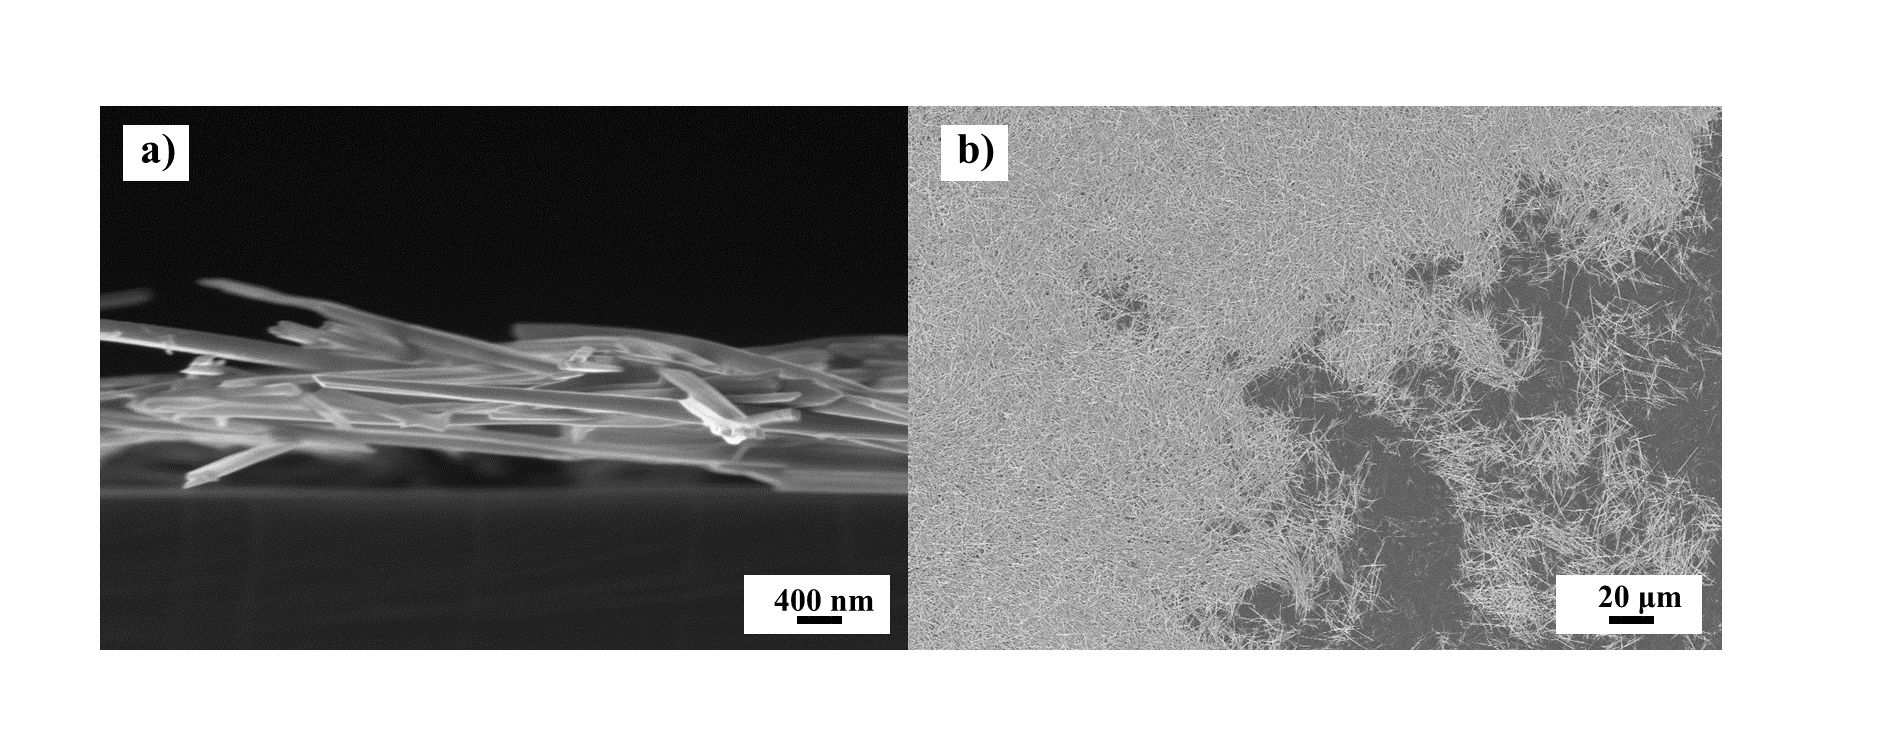


**Figure S 2 SEM images of pH1.26 synthesis a) cross-section of the nanobelts; b) low-magnification to highlight the absence of spheres within the sample.**

## EIS measurements


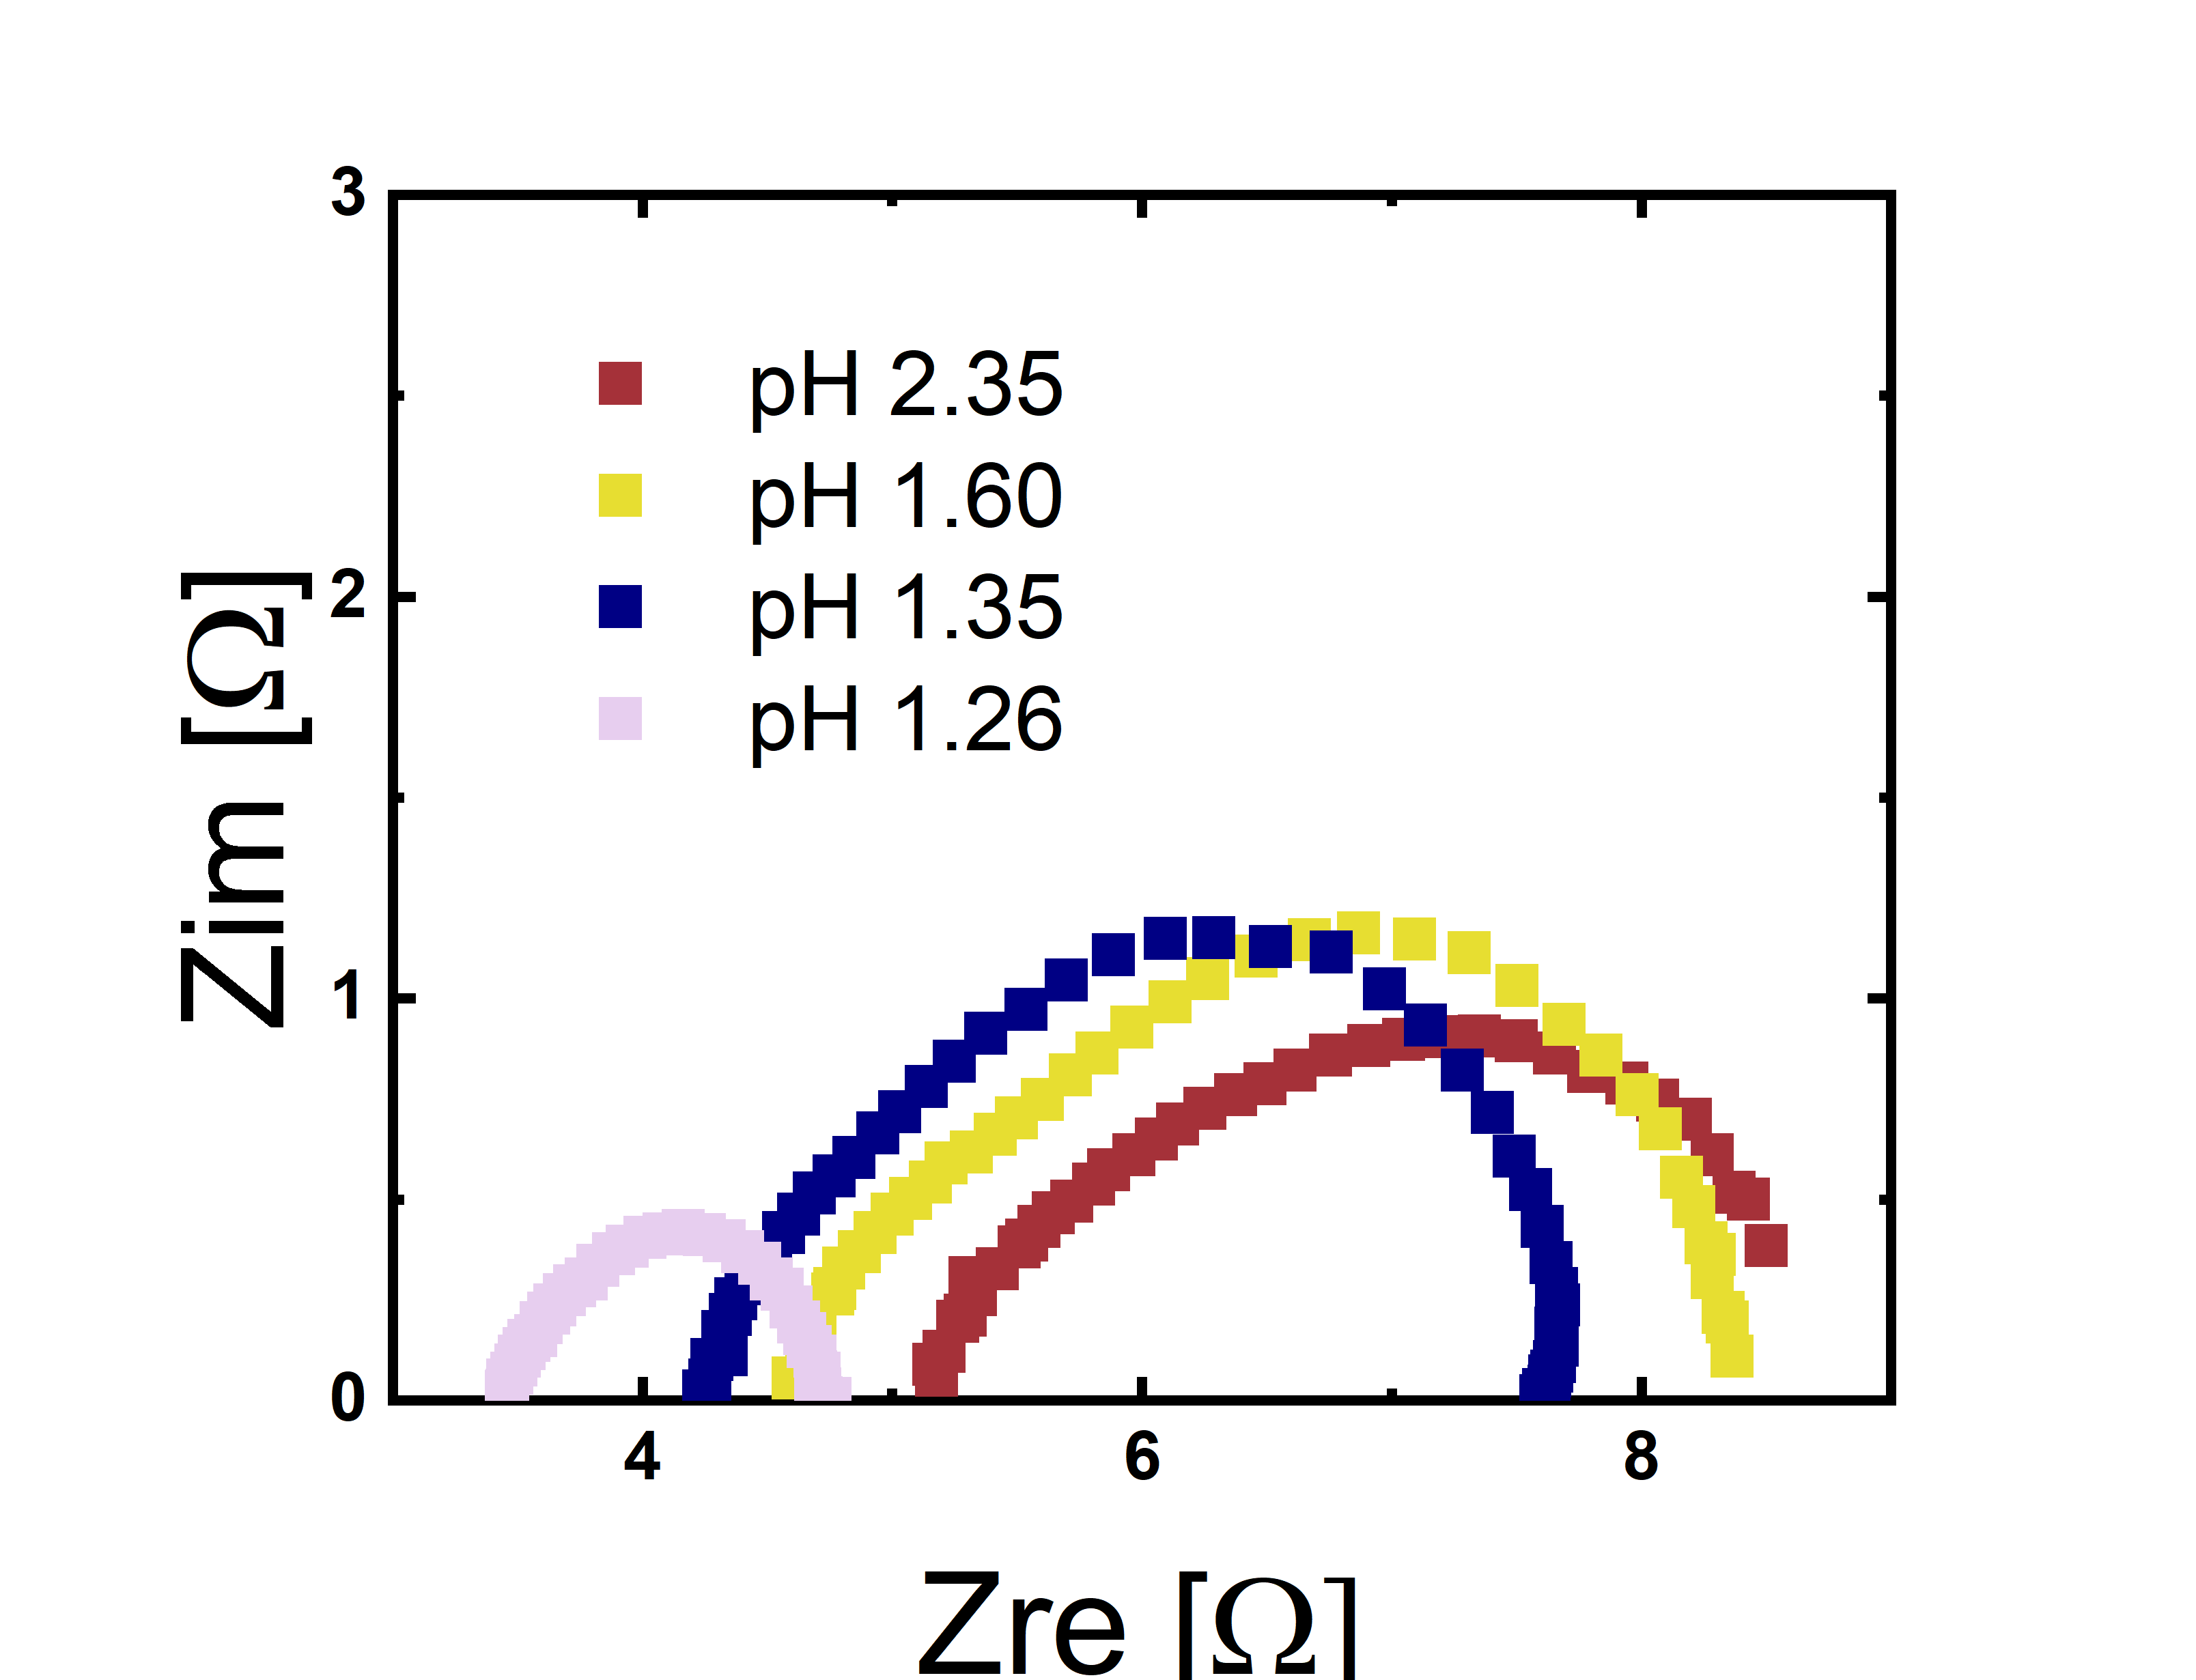


**Figure S 3 EIS measurements for pH 1.26 sample (lilac curve), pH 1.35 sample (blue curve), pH 1.60 sample (yellow curve), pH 2.35 sample (burgundy curve).**

## Mass Activity

**Table S 1 Summary of the values reported in Figure 4c.**

| Overpotential [V] | Mass Activity [A mg-1] | Catalyst loading [mg] | Catalyst | Reference |
| --- | --- | --- | --- | --- |
| 0.318 | 0.00667 | 1.5 | Zr-baed MOF-Mo2C/NF | [1] |
| 0.310 | 0.01471 | 0.68 | NiMo HNRs/TiM | [2] |
| 0.340 | 0.01 | 1 | MoO3-x | This work |
| 0.324 | 0.0125 | 0.8 | MoO3-nanobelts | This work |

## Mott-Schottky measurements


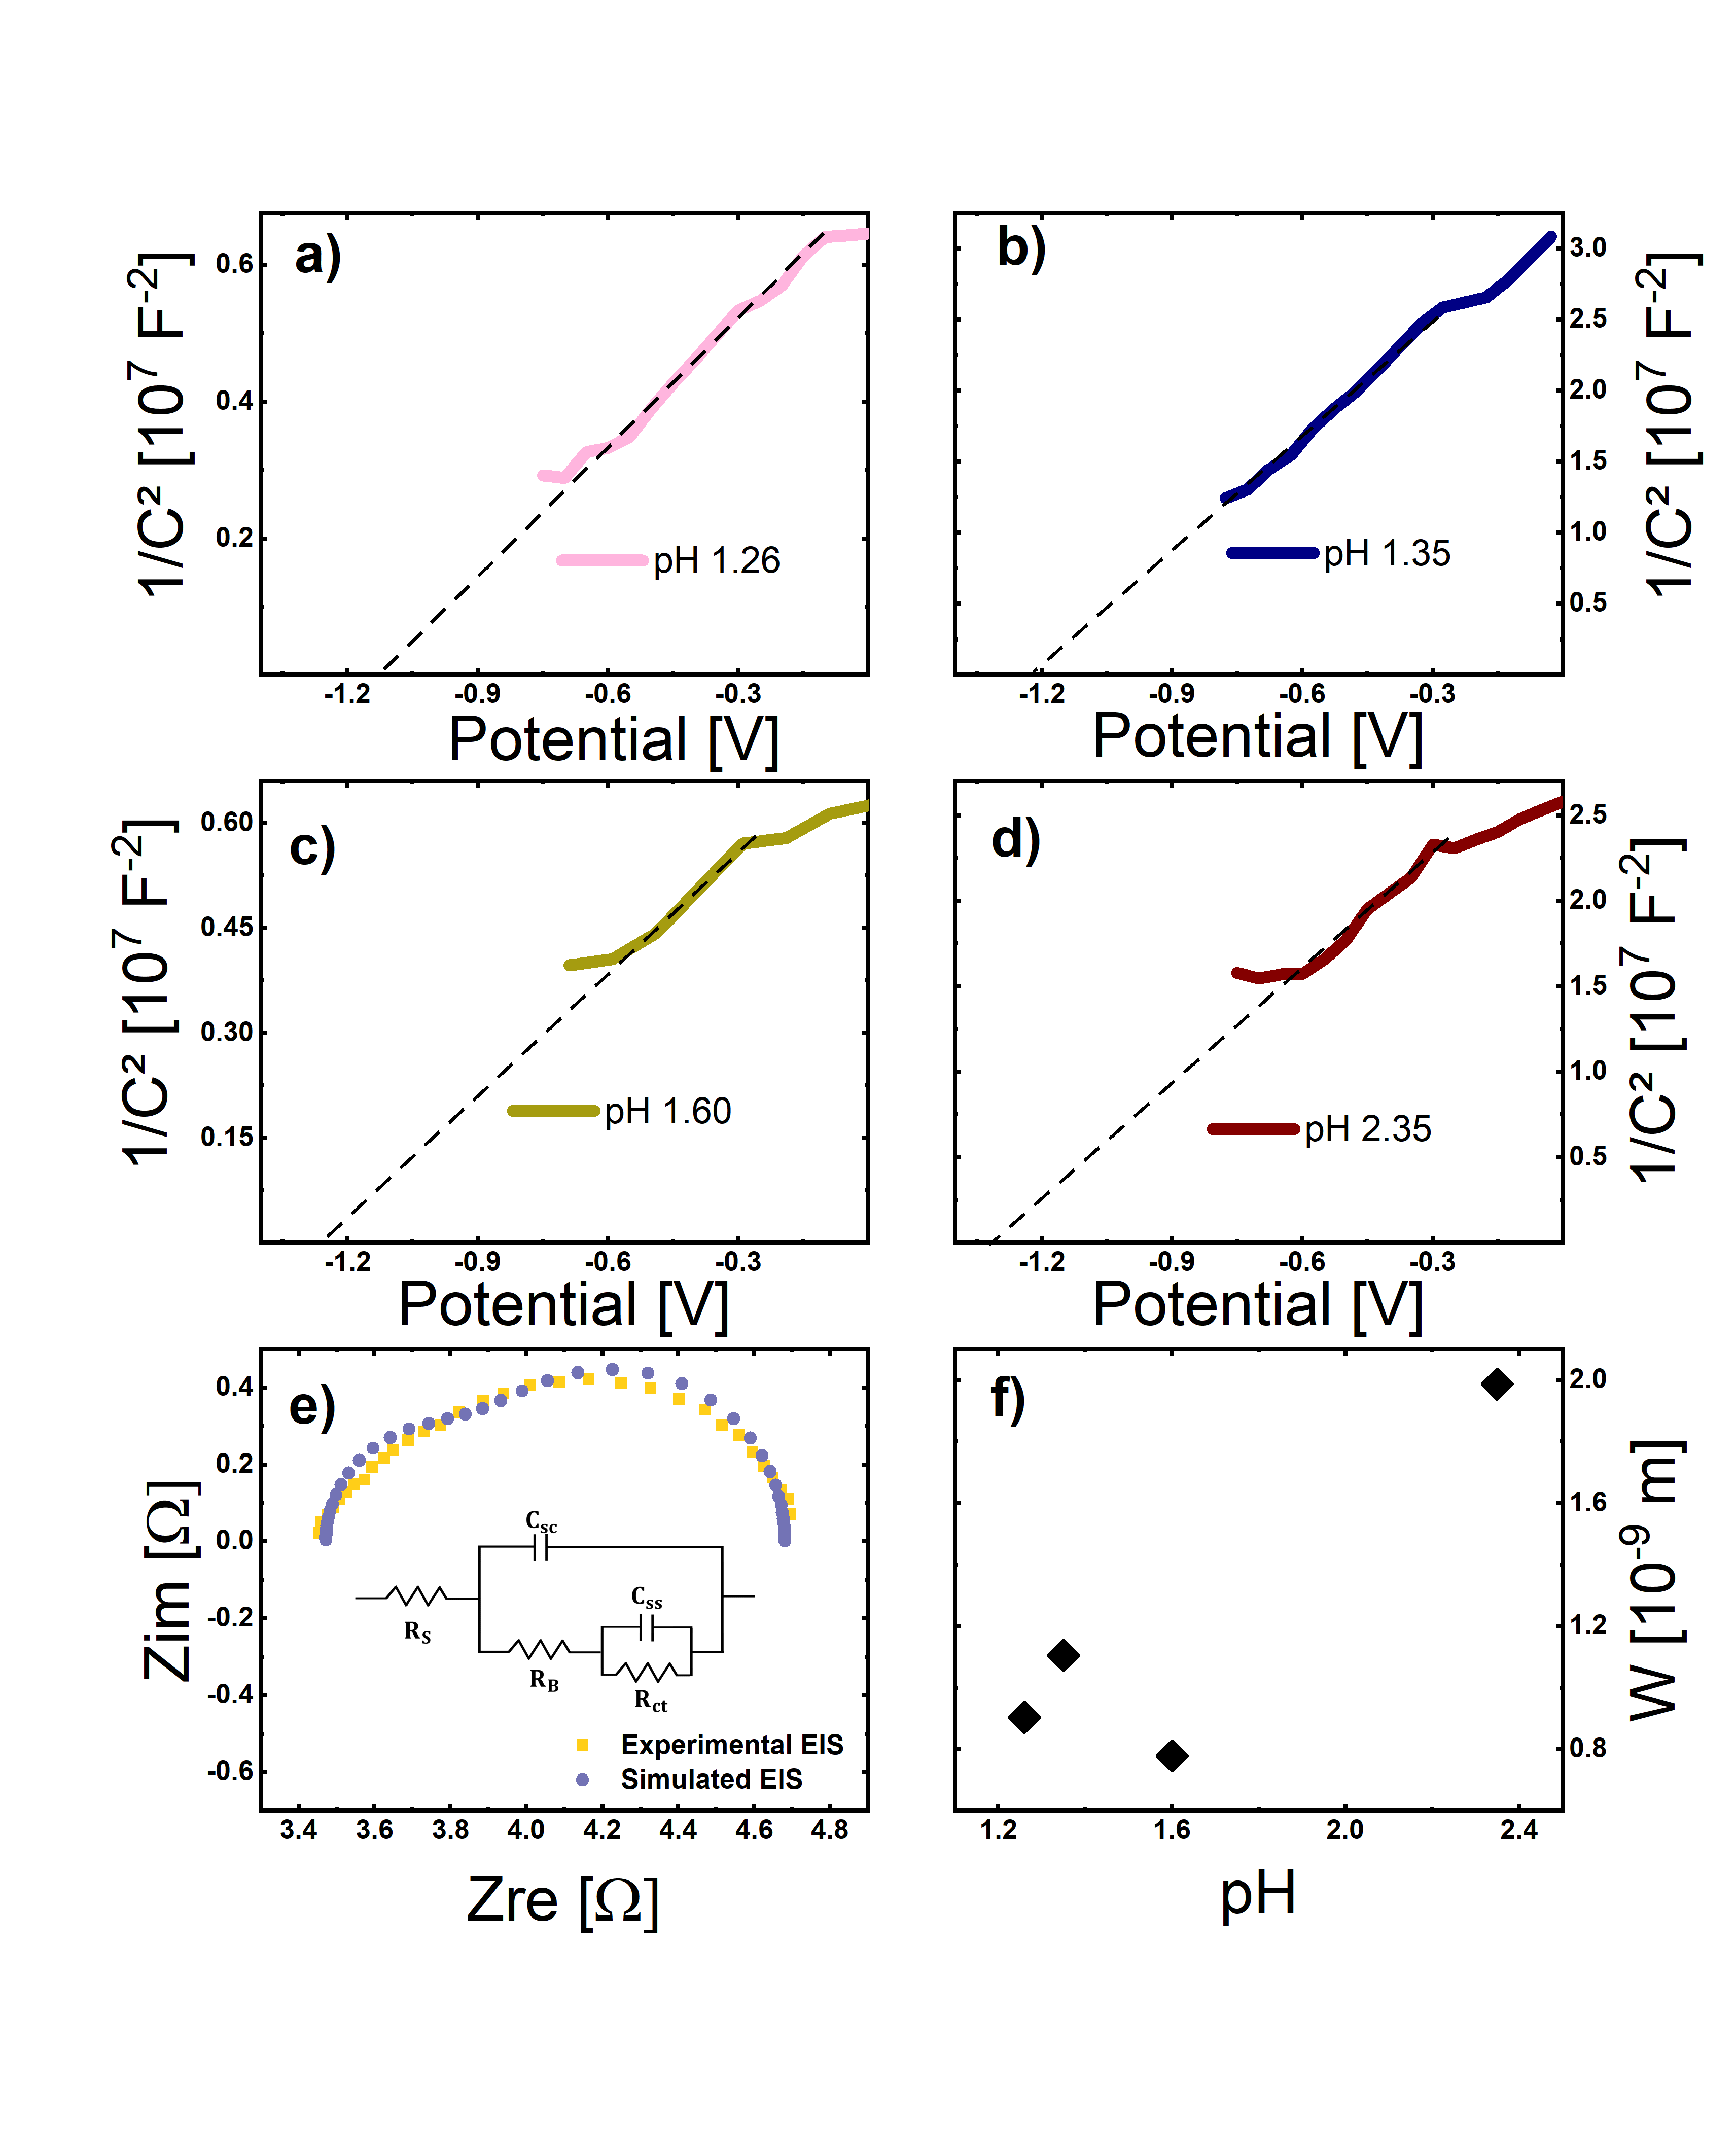


**Figure S 4 a-d) Mott-Schottky measurements for pH 1.26 sample (lilac curve), pH 1.35 sample (blue curve), pH 1.60 sample (yellow curve), pH 2.35 sample (burgundy curve.**

# References

| [1] | M. Ali et al. «Enhancing the Overall Electrocatalytic Water-Splitting Efficiency of Mo2C Nanoparticles by Forming Hybrids with UiO-66 MOF,» *ACS Omega,* vol. 6, pp. 34193-35144, 2021. |
| --- | --- |
| [2] | J. Tian et al. «Self-supported NiMo hollow nanorod array: an efficient 3D bifunctional catalytic electrode for overall water splitting,» *Journal of Materials Chemistry A,* vol. 3, pp. 20056-20059, 2015. |
